# Supplementary material for: Antibiotics can be used to contain drug-resistant bacteria by maintaining sufficiently large sensitive populations
Source: PLOS journal article supplement (doi:10.1371/journal.pbio.3000713), 2020-05-15
Supplement: S7 (10.1371/journal.pbio.3000713.s007) [file journal.pbio.3000713.s007]

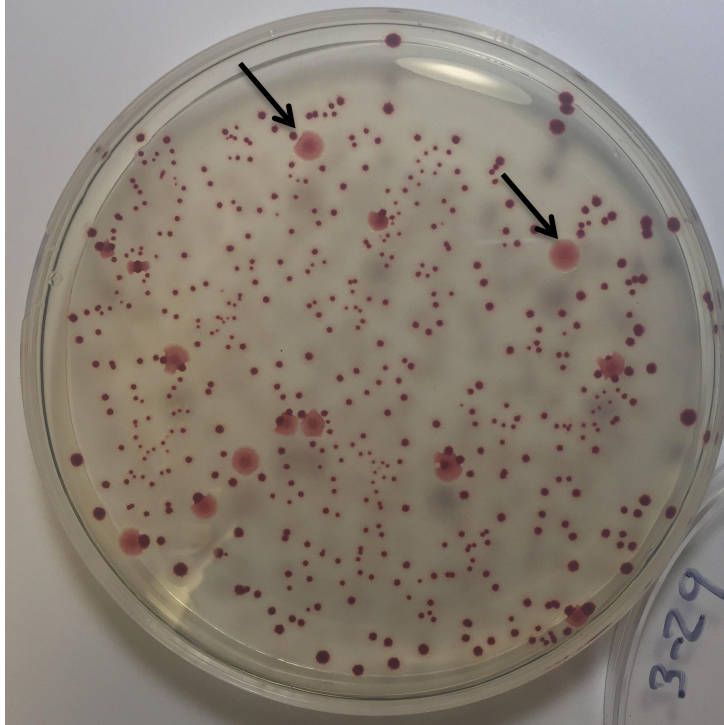

Mixed

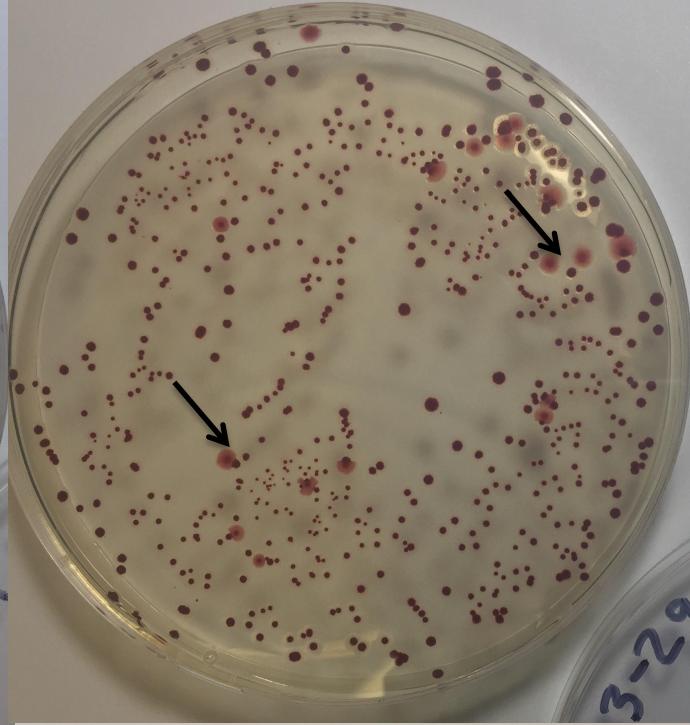

Mixed

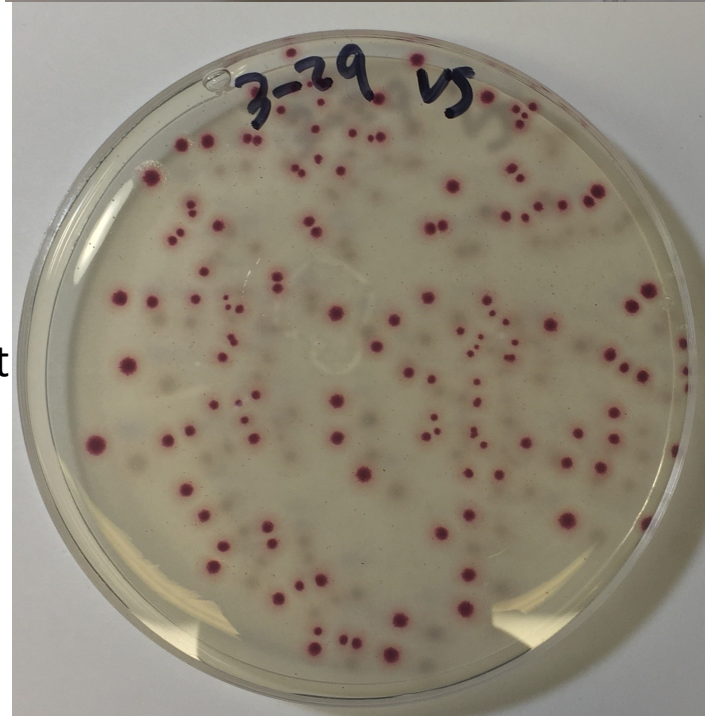

Resistant  
Only

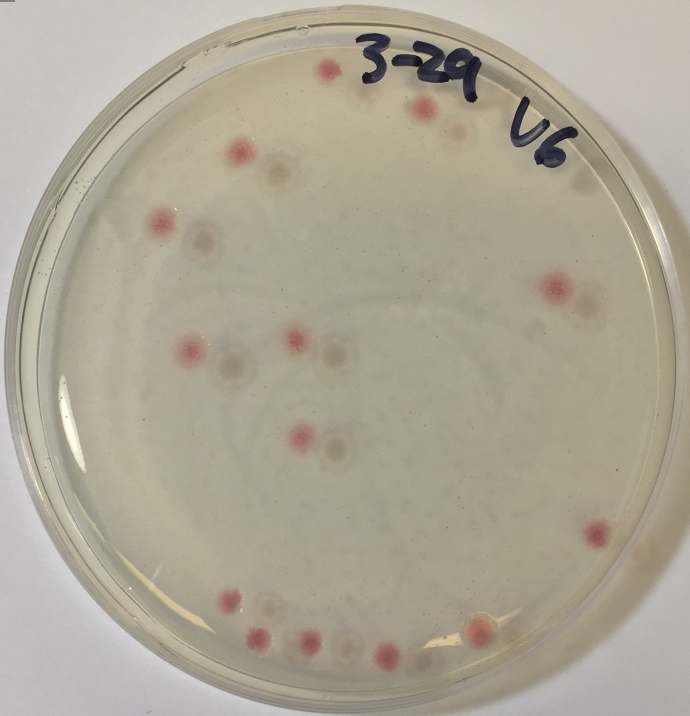

Sensitive  
Only
